# Supplementary material for: Upregulation of the APOBEC3 Family Is Associated with a Poor Prognosis and Influences Treatment Response to Raf Inhibitors in Low Grade Glioma
Source: MDPI journal article supplement (doi:10.3390/ijms221910390), 2021-09-27
Supplement: s1 [file s1]

**Supplementary Table****Table S1.** Baseline data sheet for TCGA and CGGA data.

| Characteristic     | TCGA            |                     | CGGA                |
|--------------------|-----------------|---------------------|---------------------|
|                    | Training Set    | Internal validation | External validation |
| PRS_type , No. (%) |                 |                     |                     |
| Primary            |                 |                     | 248 (60%)           |
| Recurrent          |                 |                     | 165 (40%)           |
| Grade , No. (%)    |                 |                     |                     |
| WHO II             | 157 (49%)       | 70 (50%)            | 96 (23%)            |
| WHO III            | 163 (51%)       | 69 (50%)            | 161 (39%)           |
| WHO IV             |                 |                     | 156 (38%)           |
| Gender , No. (%)   |                 |                     |                     |
| Female             | 146 (46%)       | 69 (50%)            | 182 (44%)           |
| Male               | 174 (54%)       | 70 (50%)            | 231 (56%)           |
| Age, mean $\pm$ SD | 41 ( 33 to 52 ) | 39 ( 31 to 52 )     | 43.01 $\pm$ 12.36   |
| Radio , No. (%)    |                 |                     |                     |
| No                 | 113 (35%)       | 61 (44%)            | 85 (21%)            |
| Yes                | 207 (65%)       | 78 (56%)            | 328 (79%)           |
| Chemo , No. (%)    |                 |                     |                     |
| No                 |                 |                     | 89 (22%)            |
| Yes                |                 |                     | 324 (78%)           |
