# Supplementary material for: Upregulation of the APOBEC3 Family Is Associated with a Poor Prognosis and Influences Treatment Response to Raf Inhibitors in Low Grade Glioma
Source: MDPI journal article supplement (doi:10.3390/ijms221910390), 2021-09-27
Supplement: s1 [file s1]

## Supplementary Figures S3

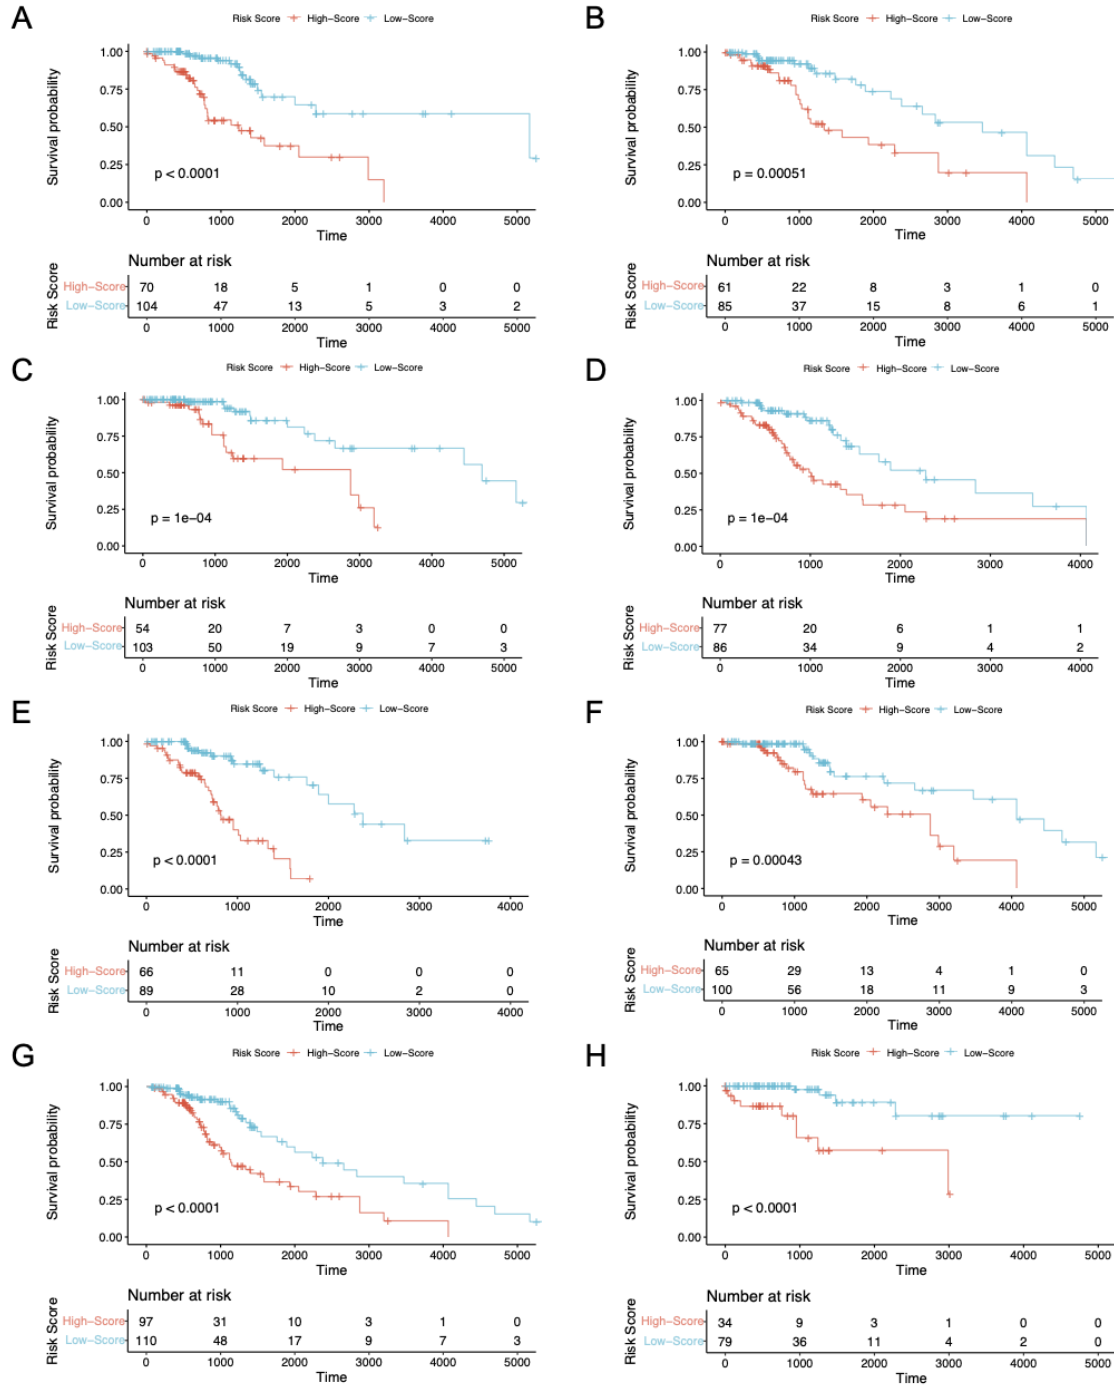

**Figure S3:** Survival analysis of cases in TCGA training cohort stratified by gender, WHO grades and Radiotherapy. Kaplan-Meier curves of OS in male (A), female (B), WHO II (C), WHO III (D), old (E), young (F), with (G) or without (H) radiotherapy patients based on risk score in low grade glioma population.
