# Supplementary material for: Upregulation of the APOBEC3 Family Is Associated with a Poor Prognosis and Influences Treatment Response to Raf Inhibitors in Low Grade Glioma
Source: MDPI journal article supplement (doi:10.3390/ijms221910390), 2021-09-27
Supplement: s1 [file s1]

## Supplementary Figures S7

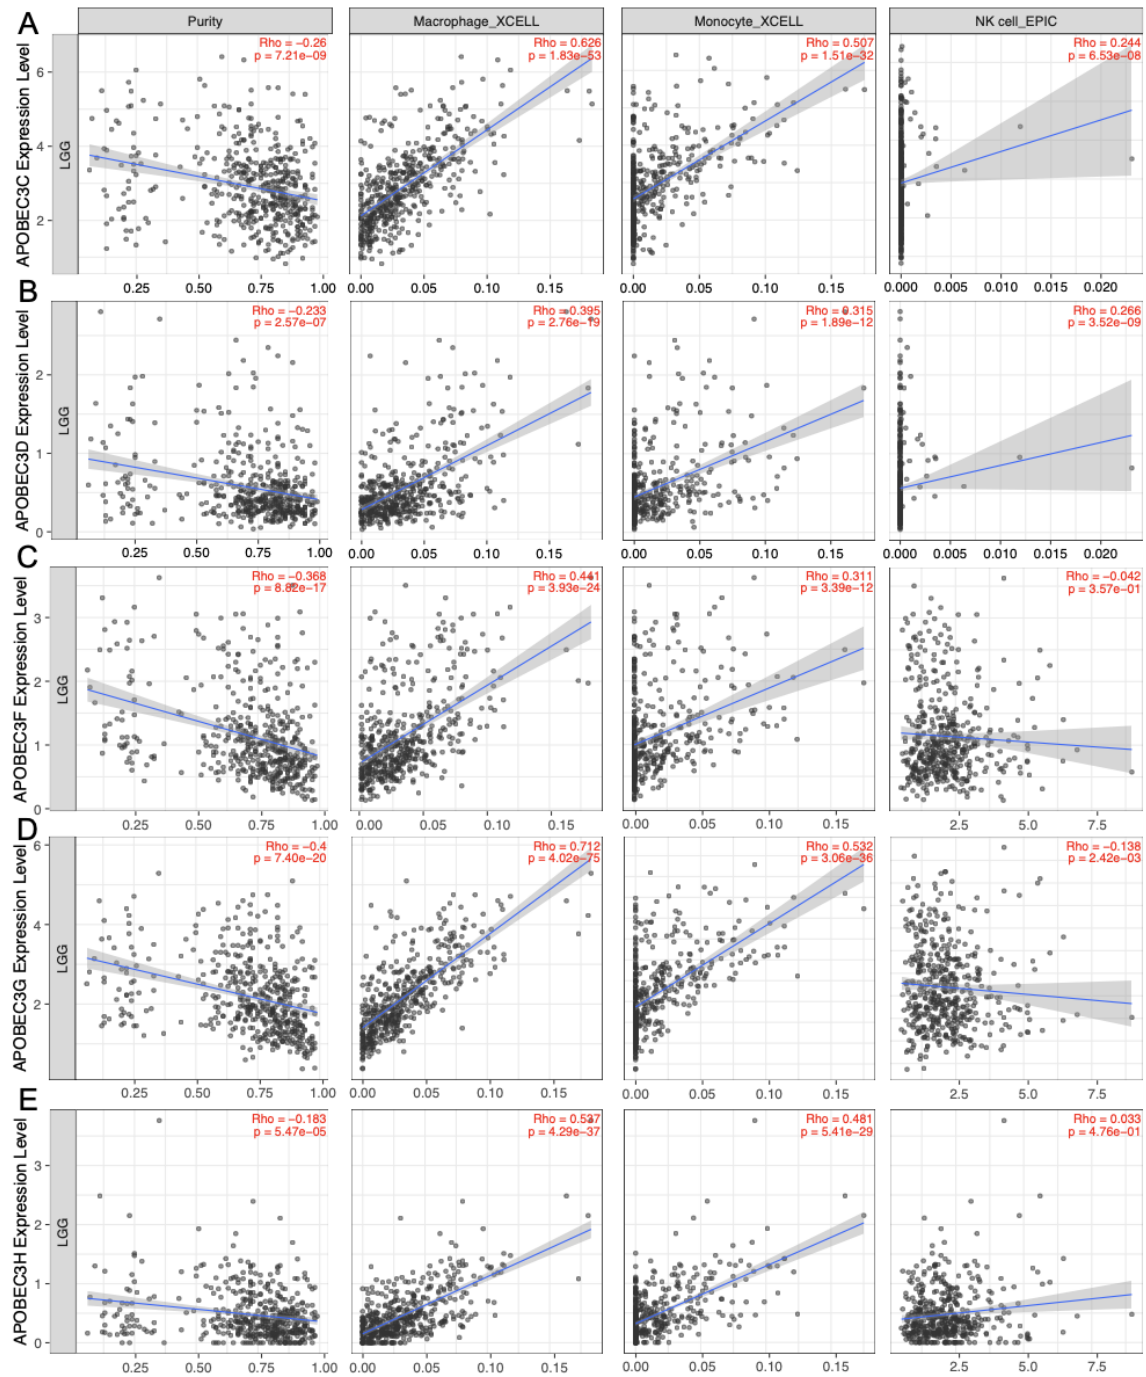

**Figure S7:** The expression of (A) APOBEC3C, (B) APOBEC3D, (C) APOBEC3F, (D) APOBEC3G and (E) APOBEC3H is associated with macrophage, monocytes and NK cells infiltration in low-grade glioma solid tumor.
