# Supplementary material for: Upregulation of the APOBEC3 Family Is Associated with a Poor Prognosis and Influences Treatment Response to Raf Inhibitors in Low Grade Glioma
Source: MDPI journal article supplement (doi:10.3390/ijms221910390), 2021-09-27
Supplement: s1 [file s1]

## Supplementary Figures S6

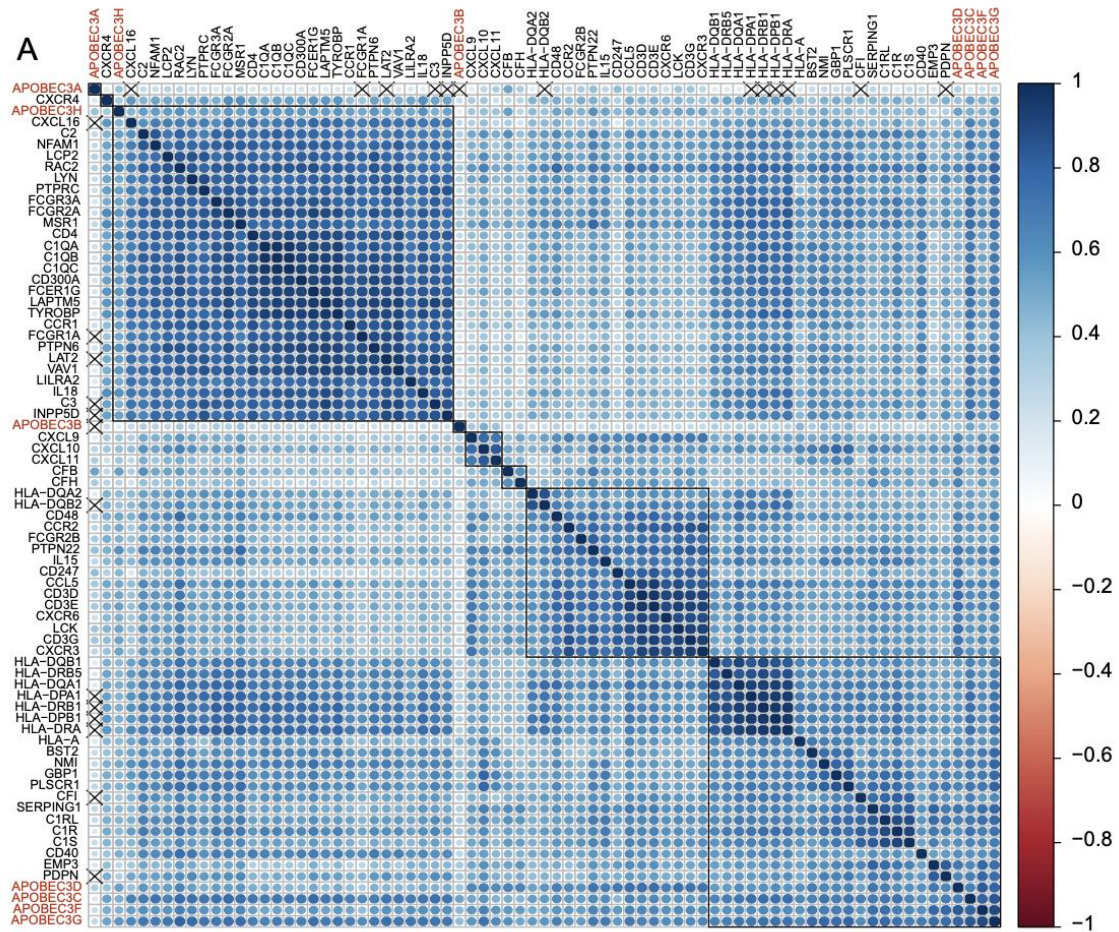

**Figure S6:** Correlation coefficients between APOBEC3 family and immune related genes annotated by MSigDB database. Cluster analysis is carried out according to the 'hclust' method of 'corrplot' package.
