# Supplementary material for: Upregulation of the APOBEC3 Family Is Associated with a Poor Prognosis and Influences Treatment Response to Raf Inhibitors in Low Grade Glioma
Source: Int J Mol Sci. 2021 Sep 27;22(19):10390. doi: 10.3390/ijms221910390 (PMC8508917; doi:10.3390/ijms221910390)
Supplement: Supplementary file 1 [file ijms-22-10390-s001.zip]

Archive with 9 entries (9 files):
- Supplementary materials S1.pdf
- Supplementary materials S2.pdf
- Supplementary materials S3.pdf
- Supplementary materials S4.pdf
- Supplementary materials S5.pdf
- Supplementary materials S6.pdf
- Supplementary materials S7.pdf
- Supplementary materials S8.pdf
- Supplementary Table.pdf
